# Supplementary material for: Adverse Effects of ImmobilisedPseudoalteromonason the Fish PathogenicVibrio anguillarum:AnIn VitroStudy
Source: Hindawi journal article supplement (doi:10.1155/2016/3683809), 2016-01-01
Supplement: f1 [file 3683809.f1.doc]

Supplemental Data

Figure S1: Photograph of an alginate bead loaded with *Pseudoalteromonas* sp. MLms_gA3 cells and matured in a 1.5 M calcium chloride solution, washed in sterilised seawater.


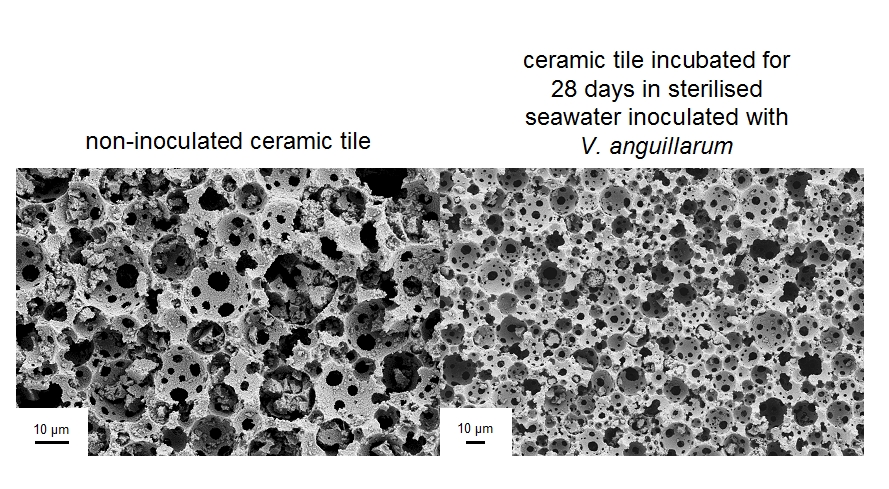


Figure S2: SEM-analysis of a ceramic tile incubated for 28 days in sterilised seawater inoculated with *V. anguillarum* (right) and of a non-inoculated ceramic tile (left). Although no biofilm was detected, a formation of *V. anguillarum* cell aggregates was not excluded.

Tabel S1: Determination of the optical density (OD) at 585 nm of *Pseudoalteromonas* sp. MLms_gA3 and *V. anguillarum* in marine bouillon with the associated viable cell counts of the pre-cultures was determined after 24 h. n.a. = not analysable.

|  |  | OD585 [nm] | viable cell count [cfu ml –1] | | | | | | | | | | |
| --- | --- | --- | --- | --- | --- | --- | --- | --- | --- | --- | --- | --- | --- |
|  |  |  | 1. Count | | | |  | 2. Count | | | |  |  |
|  |  |  | 1 | 2 | 3 | average | *108  (= dilution step)  [cfu ml -1] | 1 | 2 | 3 | average | *108 (= dilution step)  [cfu ml -1] | average 1. and 2. Count  [cfu ml -1] |
| pellet resuspended in  5 ml sterilised  artificial sea water | *P*. sp. MLms_gA3  in MB | **1.870** | 6 | 12 | 12 | 10 | 1.00E+09 | 10 | 14 | 14 | 12.67 | 1.27E+09 | **1.13E+09** |
| *V. anguillarum*  in MB | **0.890** | 24 | 29 | n.a. | 26.5 | 2.65E+09 | 21 | n.a. | n.a. | 21 | 2.10E+09 | **2.38E+09** |
